# Supplementary material for: Outcomes Following Vascular and Endovascular Procedures Performed During the First COVID-19 Pandemic Wave
Source: PubMed Central journal article supplement (PMC11462031; doi:10.1016/j.ejvsvf.2024.08.002), 2024-09-19
Supplement: mmc1.pdf [file mmc1.pdf]

**Supplementary Table S1.** Country of recruitment of study participants.

| <b>Country</b> | <b>Number of procedures</b> | <b>%</b> |
|----------------|-----------------------------|----------|
| Great Britain  | 1152                        | 36.57    |
| Australia      | 754                         | 23.94    |
| Italy          | 268                         | 8.51     |
| Greece         | 219                         | 6.95     |
| Hong Kong      | 148                         | 4.70     |
| Saudi Arabia   | 115                         | 3.65     |
| USA            | 114                         | 3.62     |
| Spain          | 101                         | 3.21     |
| Bahrain        | 50                          | 1.59     |
| Egypt          | 47                          | 1.49     |
| Austria        | 35                          | 1.11     |
| Malaysia       | 31                          | 0.98     |
| Lybia          | 30                          | 0.95     |
| Sudan          | 22                          | 0.70     |
| Israel         | 13                          | 0.41     |
| Sri Lanka      | 13                          | 0.41     |
| New Zealand    | 11                          | 0.35     |
| Turkey         | 10                          | 0.32     |
| Ireland        | 8                           | 0.25     |
| Brazil         | 5                           | 0.16     |
| Jordan         | 4                           | 0.13     |
| Total          | 3150                        | 100      |
