# Supplementary material for: Outcomes Following Vascular and Endovascular Procedures Performed During the First COVID-19 Pandemic Wave
Source: PubMed Central journal article supplement (PMC11462031; doi:10.1016/j.ejvsvf.2024.08.002), 2024-09-19
Supplement: mmc2.pdf [file mmc2.pdf]

**Supplementary Table S2.** Six month outcomes of aortic procedures performed for abdominal aortic aneurysms ( $n = 370$ ) stratified by indication and urgency of the procedure.

|                          | <b>Elective/<br/>expedited</b> | <b>Urgent non-<br/>ruptured</b> | <b>Ruptured</b> |
|--------------------------|--------------------------------|---------------------------------|-----------------|
| <b>30-day outcomes</b>   |                                |                                 |                 |
| Non-SARS-CoV-2 pneumonia | 9 (3.3)                        | 4 (9.1)                         | 8 (17.4)        |
| Mortality                | 18 (6.5)                       | 10 (22.7)                       | 16 (34.8)       |
| <b>6-month outcomes</b>  |                                |                                 |                 |
| Mortality                | 21 (7.6)                       | 12 (27.3)                       | 17 (37.0)       |
| Myocardial infarction    | 14 (5.1)                       | 5 (11.4)                        | 9 (19.6)        |
| Non-SARS-CoV-2 pneumonia | 23 (8.3)                       | 4 (9.1)                         | 15 (32.6)       |
| Re-intervention          | 25 (9.0)                       | 5 (11.4)                        | 9 (19.6)        |

Data are presented as n (%).

Indications for surgery for elective/expedited and urgent non-ruptured aneurysms included reaching size threshold, rapid growth, or being symptomatic.
