# Supplementary material for: Outcomes Following Vascular and Endovascular Procedures Performed During the First COVID-19 Pandemic Wave
Source: PubMed Central journal article supplement (PMC11462031; doi:10.1016/j.ejvsvf.2024.08.002), 2024-09-19
Supplement: mmc3.pdf [file mmc3.pdf]

**Supplementary Table S3.** Six month mortality (%) by procedure type and country for the eight countries that contributed over 100 procedures in total in this study.

|               | <b>Aortic</b> | <b>Carotid</b> | <b>Lower limb<br/>revascularisation</b> | <b>Amputation</b> | <b>Vascular<br/>access</b> |
|---------------|---------------|----------------|-----------------------------------------|-------------------|----------------------------|
| Great Britain | 10.2          | 4.7            | 11.5                                    | 14.9              | 21.2                       |
| Australia     | 9.2           | 5.5            | 9.3                                     | 13.3              | 10.1                       |
| Italy         | 19.6          | 4.7            | 6.6                                     | 36.8              | n/a                        |
| Greece        | 20.4          | 11.4           | 22.4                                    | 21.1              | n/a                        |
| Hong Kong     | 2.8           | n/a            | 2.8                                     | n/a               | 3.5                        |
| Saudi Arabia  | n/a           | n/a            | 29.0                                    | 10.5              | 31.7                       |
| USA           | n/a           | n/a            | 7.4                                     | 10.3              | n/a                        |
| Spain         | 11.8          | n/a            | 7.8                                     | 0.0               | 7.7                        |

Data are presented as percentages and are shown if 10 or more procedures of a specific type were submitted, otherwise the percentage is replaced by n/a. Frequencies are not shown to prevent de-identification due to small numbers.
