# Supplementary material for: Outcomes Following Vascular and Endovascular Procedures Performed During the First COVID-19 Pandemic Wave
Source: PubMed Central journal article supplement (PMC11462031; doi:10.1016/j.ejvsvf.2024.08.002), 2024-09-19
Supplement: mmc4.pdf [file mmc4.pdf]

**Supplementary Table S4.** Odds ratio and 95% confidence intervals for six month mortality from a multivariable model.

|                           | <b>Odds Ratio</b> | <b>95% CI</b> | <b>p-values</b> |
|---------------------------|-------------------|---------------|-----------------|
| <b>Confirmed COVID-19</b> | 3.18              | 2.14-4.73     | <.001           |
| <b>Diabetes mellitus</b>  | 1.29              | 1.03-1.61     | .029            |
| <b>Statin</b>             | 0.69              | 0.55-0.87     | .002            |
| <b>ASA grade</b>          |                   |               | .002            |
| ASA 1-2                   | 1.00              | -             |                 |
| ASA 3-5                   | 1.76              | 1.23-2.53     |                 |
| <b>Frailty</b>            |                   |               | <.001           |
| Frailty score 1-3         | 1.00              | -             |                 |
| Frailty score 4-6         | 1.35              | 1.06-1.71     |                 |
| Frailty score 7-9         | 2.28              | 1.48-3.53     |                 |
| <b>Urgency</b>            |                   |               | <.001           |
| Elective or Scheduled     | 1.00              | -             |                 |
| Urgent or Emergency       | 1.85              | 1.47-2.33     |                 |
