# Supplementary material for: Outcomes Following Vascular and Endovascular Procedures Performed During the First COVID-19 Pandemic Wave
Source: PubMed Central journal article supplement (PMC11462031; doi:10.1016/j.ejvsvf.2024.08.002), 2024-09-19
Supplement: mmc5.pdf [file mmc5.pdf]

**Supplementary Table S5.** One year outcomes of 2 396 patients with submitted one year follow up data.

|                             | <b>Aortic</b> | <b>Carotid</b> | <b>Lower limb<br/>revascularisation</b> | <b>Amputation</b> | <b>Vascular<br/>access</b> |
|-----------------------------|---------------|----------------|-----------------------------------------|-------------------|----------------------------|
| Myocardial infarction       | 27 (8.5)      | 2 (0.9)        | 43 (4.2)                                | 32 (7.1)          | 2 (1.2)                    |
| Stroke                      | 3 (1.0)       | 6 (2.6)        | 10 (1.0)                                | 6 (1.3)           | 0 (0)                      |
| SARS-CoV-2 pneumonia        | 6 (1.9)       | 8 (3.4)        | 36 (3.5)                                | 16 (3.6)          | 2 (1.2)                    |
| Pneumonia of other cause    | 37 (11.7)     | 4 (1.7)        | 56 (5.4)                                | 34 (7.5)          | 1 (0.6)                    |
| SSI not requiring admission | 8 (2.5)       | 2 (0.9)        | 75 (7.2)                                | 46 (10.2)         | 0 (0)                      |
| SSI requiring admission     | 7 (2.2)       | 0 (0)          | 96 (9.3)                                | 57 (12.6)         | 2 (1.2)                    |
| Graft/stent occlusion       | 10 (3.2)      | 3 (1.3)        | 70 (6.8)                                | -                 | 6 (3.6)                    |
| Major amputation            | -             | -              | 87 (8.4)                                | -                 | -                          |
| Re-intervention             | 30 (9.5)      | 6 (2.6)        | 224 (21.6)                              | 72 (16.0)         | 18 (10.7)                  |
| Readmission                 | 46 (14.6)     | 13 (5.6)       | 231 (22.3)                              | 105 (23.3)        | 25 (14.8)                  |
| Mortality                   | 50 (15.8)     | 21 (9.0)       | 138 (13.3)                              | 76 (16.9)         | 27 (16.0)                  |

Data are presented as n (%).
